# Supplementary material for: ATF4 is an oxidative stress–inducible, prodeath transcription factor in neurons in vitro and in vivo
Source: PubMed Central journal article supplement — J Exp Med. 2008 May 12;205(5):1227–42. doi: 10.1084/jem.20071460 (PMC2373852; doi:10.1084/jem.20071460), 2008-05-12
Supplement: jem.20071460_3.pdf [file jem.20071460_3.pdf]

**Table S1.** Comparison of the gene array data from this study with array data obtained from ATF4-deficient fibroblasts

| Product/homology                                      | GenBank                                                               | This study | Atf4 <sup>-</sup> |    | UT      |     | Perk <sup>-</sup> |     | UT      |     |     |
|-------------------------------------------------------|-----------------------------------------------------------------------|------------|-------------------|----|---------|-----|-------------------|-----|---------|-----|-----|
|                                                       |                                                                       |            | Tm                |    | Tm      |     | Tm                |     | Tm      |     |     |
|                                                       |                                                                       |            | % of WT           | SD | % of WT | SD  | % of WT           | SD  | % of WT | SD  |     |
| <b>Translation, amino acid import, and metabolism</b> |                                                                       |            |                   |    |         |     |                   |     |         |     |     |
| Asns                                                  | asparagine synthetase                                                 | U38940     | x                 | 14 | 1       | 24  | 4                 | 67  | 11      | 58  | 4   |
| EST                                                   | alanyl tRNA synthetase homolog                                        | AI839392   | x                 | 17 | 1       | 42  | 5                 | 67  | 7       | 91  | 5   |
| Slc7a5                                                | cationic amino acid transporter, y+ system                            | AB017189   | x                 | 18 | 1       | 40  | 9                 | 40  | 18      | 55  | 13  |
| AAAT                                                  | neutral amino acid transporter B                                      | L42115     |                   | 22 | 1       | 63  | 2                 | 62  | 0       | 170 | 85  |
| Mthfd2                                                | methylenetetrahydrofolate dehydrogenase                               | J04627     | x                 | 22 | 5       | 36  | 7                 | 87  | 21      | 68  | 8   |
| Rpms7                                                 | phosphoserine aminotransferase homolog                                | AW122030   | x                 | 25 | 1       | 32  | 2                 | 86  | 37      | 85  | 6   |
| EST                                                   | L-3-phosphoserine phosphatase homolog                                 | AI846545   |                   | 27 | 1       | 52  | 10                | 63  | 3       | 63  | 5   |
| PHAS-I; eIF4Ebp1                                      | eukaryotic translation initiation regulator                           | U28656     | x                 | 27 | 2       | 46  | 1                 | 59  | 15      | 64  | 0   |
| Nars                                                  | asparaginyl-tRNA synthetase                                           | AW125874   | x                 | 27 | 1       | 40  | 4                 | 52  | 7       | 69  | 14  |
| WRS                                                   | tryptophan-tRNA synthetase                                            | X69656     |                   | 31 | 2       | 44  | 19                | 10  | 3       | 43  | 13  |
| meca39; Bcat1                                         | branched chain aminotransferase 1                                     | U42443     |                   | 32 | 3       | 46  | 7                 | 53  | 15      | 66  | 33  |
| EST                                                   | threonyl-tRNA synthetase homolog                                      | AI849620   | x                 | 32 | 6       | 45  | 7                 | 58  | 24      | 74  | 11  |
| EST                                                   | leucyl-tRNA synthetase homolog                                        | AI844089   |                   | 33 | 0       | 55  | 9                 | 50  | 3       | 68  | 11  |
| Slc3a2                                                | 4F2 antigen heavy chain, amino acid transporter                       | X14309     | x                 | 35 | 2       | 63  | 14                | 86  | 23      | 82  | 8   |
| EST                                                   | SY-Y-Tyrosyl tRNA synthetase homolog                                  | AW122542   |                   | 40 | 2       | 64  | 3                 | 70  | 2       | 89  | 7   |
| EST                                                   | isoleucine-tRNA synthetase homolog                                    | AI848393   |                   | 45 | 0       | 52  | 8                 | 83  | 5       | 89  | 14  |
| <b>Redox or detoxification</b>                        |                                                                       |            |                   |    |         |     |                   |     |         |     |     |
| EST                                                   | NADH-cytochrome B5 reductase homolog                                  | AI839690   |                   | 18 | 1       | 43  | 1                 | 19  | 4       | 47  | 14  |
| Cpo                                                   | coproporphyrinogen oxidase (hem6)                                     | D16333     |                   | 32 | 2       | 82  | 39                | 31  | 1       | 47  | 22  |
| Ero11-pending                                         | ERO1 like, oxidoreductase                                             | AA798624   |                   | 36 | 1       | 63  | 16                | 57  | 6       | 77  | 24  |
| EST                                                   | FKBP13/PDI homolog                                                    | AW122851   |                   | 39 | 6       | 25  | 0                 | 81  | 2       | 75  | 0   |
| HO-1, Gmox1                                           | heme oxygenase                                                        | X56824     | x                 | 45 | 2       | 65  | 5                 | 67  | 3       | 69  | 5   |
| <b>Transcription</b>                                  |                                                                       |            |                   |    |         |     |                   |     |         |     |     |
| C/EBPBeta                                             | CCAAT/enhancer binding protein, Beta                                  | M61007     | x                 | 15 | 4       | 31  | 2                 | 29  | 7       | 51  | 17  |
| Prx2                                                  | homeo box of paired rule                                              | X52875     | x                 | 32 | 2       | 22  | 2                 | 52  | 2       | 59  | 6   |
| C/EBRGamma                                            | GPE1-BP (C/EBPGamma)                                                  | AB012273   |                   | 48 | 5       | 65  | 12                | 41  | 2       | 85  | 26  |
| <b>Secreted or transmembrane protein</b>              |                                                                       |            |                   |    |         |     |                   |     |         |     |     |
| ptx3                                                  | pentaxin related gene galactoside-binding lectin; IgE binding protein | X83601     |                   | 7  | 1       | 31  | 14                | 10  | 1       | 32  | 10  |
| Lgals3, L-34                                          |                                                                       | X16834     |                   | 15 | 1       | 18  | 11                | 238 | 120     | 207 | 148 |
| EST                                                   | coagulation factor XIIIa homolog                                      | AI839918   |                   | 19 | 1       | 46  | 8                 | 50  | 12      | 71  | 1   |
| X11Gamma                                              | X11gamma protein, mint3, APBA3, Mint-3                                | AF070975   | x                 | 33 | 2       | 46  | 3                 | 58  | 3       | 99  | 17  |
| PMP22                                                 | Peripheral myelin protein                                             | Z38110     | x                 | 37 | 3       | 40  | 1                 | 102 | 52      | 52  | 10  |
| Nid2, Ly111                                           | Nidogen 2; entactin-2                                                 | AB017202   | x                 | 41 | 14      | 38  | 9                 | 154 | 15      | 57  | 10  |
| <b>Signalling</b>                                     |                                                                       |            |                   |    |         |     |                   |     |         |     |     |
| IGFBP-2                                               | insulin-like growth factor binding protein-2                          | X81580     |                   | 7  | 0       | 9   | 1                 | 13  | 7       | 12  | 2   |
| Osmr                                                  | Oncostatin M receptor beta                                            | AB015978   |                   | 26 | 9       | 28  | 9                 | 23  | 6       | 66  | 16  |
| EST                                                   | EST, GTP-binding protein homolog                                      | AA867773   |                   | 36 | 6       | 60  | 0                 | 88  | 16      | 100 | 10  |
| OPG; Tnfrsf11b                                        | osteoprotegerin, TGFbeta family                                       | U94331     |                   | 39 | 2       | 42  | 13                | 37  | 4       | 38  | 10  |
| Arhj                                                  | Ras homolog gene family                                               | AW121127   |                   | 44 | 2       | 53  | 4                 | 20  | 12      | 19  | 4   |
| Wispl                                                 | WNT1 inducible signaling pathway protein 1                            | AF100777   | x                 | 46 | 0       | 97  | 11                | 21  | 2       | 27  | 8   |
| Grb10                                                 | growth factor receptor binding protein                                | U18996     |                   | 47 | 5       | 50  | 13                | 70  | 8       | 71  | 12  |
| <b>Miscellaneous</b>                                  |                                                                       |            |                   |    |         |     |                   |     |         |     |     |
| Lon                                                   | Lon mitochondrial protease homolog                                    | AI838015   |                   | 2  | 1       | 104 | 109               | 27  | 3       | 195 | 174 |
| PEDF, Serpinf11                                       | serpin-f1 pigment epithelium-derived factor                           | AF036164   | x                 | 10 | 1       | 20  | 3                 | 29  | 1       | 37  | 1   |
| Gys                                                   | muscle glycogen synthase                                              | U53218     |                   | 43 | 0       | 50  | 0                 | 44  | 3       | 56  | 4   |
| Clic4                                                 | chloride intracellular channel 4 (mitochondrial)                      | AI849533   | x                 | 46 | 1       | 70  | 13                | 62  | 3       | 46  | 10  |
| MIBP-1                                                | myc-intron-binding protein-1                                          | Y15907     |                   | 47 | 0       | 69  | 8                 | 24  | 33      | 56  | 12  |

An x indicates that the respective gene appears in both datasets as differentially expressed. 42 genes were extracted in the fibroblast array, of which 18 overlap with this study. These are 43% of the 42 genes of the fibroblast data resulting in a high level of significance at the hypergeometric test ( $P < 0.00001$ ).

**Table S2.** Physiological data from ATF4<sup>+/+</sup> and ATF4<sup>-/-</sup> mice

|                               |        | <b>WT</b>     | <b>KO</b>     |
|-------------------------------|--------|---------------|---------------|
| before MCAo                   |        |               |               |
| pO <sub>2</sub>               | mmHg   | 101.33 ± 3.51 | 101.33 ± 2.08 |
| pCO <sub>2</sub>              | mmHg   | 35.33 ± 0.58  | 33.67 ± 0.58  |
| pH                            |        | 7.44 ± 0.02   | 7.39 ± 0.02   |
| HCO <sub>3</sub> <sup>-</sup> | mmol/l | 22.61 ± 1.28  | 21.84 ± 0.42  |
| Glucose                       | mg/dl  | 87.94 ± 3.78  | 90.38 ± 1.7   |
| Lactate                       | mmol/l | 1.20 ± 0.11   | 1.2 ± 0.07    |
| mABP                          |        | 73.95 ± 2.56  | 72.95 ± 2.94  |
| mT                            | °C     | 36.01 ± 0.19  | 35.61 ± 0.4   |
| after MCAo                    |        |               |               |
| pO <sub>2</sub>               | mmHg   | 97.67 ± 1.53  | 96.67 ± 0.58  |
| pCO <sub>2</sub>              | mmHg   | 32.33 ± 1.53  | 33.67 ± 1.15  |
| pH                            |        | 7.39 ± 0.02   | 7.38 ± 0.03   |
| HCO <sub>3</sub> <sup>-</sup> | mmol/l | 20.59 ± 0.66  | 20.86 ± 0.57  |
| Glucose                       | mg/dl  | 86.58 ± 5.03  | 85.28 ± 1.05  |
| Lactate                       | mmol/l | 1.21 ± 0.05   | 1.19 ± 0.05   |
| mABP                          |        | 67.38 ± 2.71  | 66.31 ± 1.11  |
| mT                            | °C     | 35.49 ± 0.37  | 35.61 ± 0.41  |

Shown are the values for blood gases, pH, levels of bicarbonate, glucose, and lactate, and values for mean arterial blood pressure and body temperature. Measurements were carried out 45 min before and after MCAo for three animals each.
